# Supplementary material
Source: Springer Nature journal article supplement (https://www.springermedizin.de/resource/supplementary/13058_2013_3261_MOESM7_ESM.pdf/9703714)
Supplement: MOESM7 [file 9703714]

Healthy women  
High risk low risk

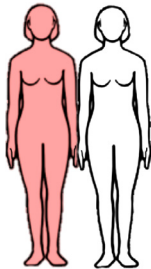

Primary cancer

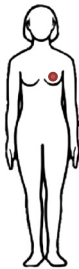

Treatment

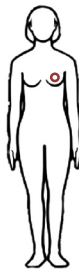

Remission

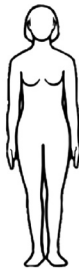

Outcome

Cure Metastasis

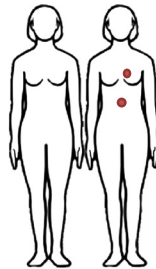

Resistance

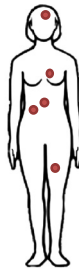

## SAMPLES

Blood /genomic DNA  
Normal breast tissue

Tumour -FNA/TMA  
Blood - ctDNA, CTC,  
metabolomics  
Marrow biopsy - DTC  
Multimodality imaging

Male/female  
Ethnically diverse  
Pre/post menopausal

Metastases  
Blood - ctDNA, CTC,  
Metabolomics  
Multimodality imaging

## OUTPUT

- Biomarkers of risk
- Effects of lifestyle changes/interventions
- Early detection

- Molecular subtypes/staging
- Known biomarkers (ER, HER2 etc)
- Diagnostic biomarkers
- Prognostic biomarkers
- Response biomarkers
- Treatment toxicity biomarkers
- New cell lines and PDX

- Progression biomarkers
- Changes in ER/HER2 etc
- Metastasis genes
- 'Organotropism' genes
- Resistance biomarkers
- New therapeutic targets
- New cell lines and PDX
